# Supplementary material for: Selenium-Enriched Soybean Peptides as Novel Organic Selenium Compound Supplements: Inhibition of Occupational Air Pollution Exposure-Induced Apoptosis in Lung Epithelial Cells
Source: MDPI journal article supplement (doi:10.3390/nu16010071), 2023-12-25
Supplement: s1 [file s1]

## Online Supplemental Materials

### Selenium-Enriched Soybean Peptides as Novel Organic Selenium Compound Supplements: Inhibition of Occupational Air Pollution Exposure-Induced Apoptosis in Lung Epithelial Cells

Jian Zhang, Wenhui Li, He Li \*, Wanlu Liu, Lu Li and Xinqi Liu

**Table S1.** The amino acid compositions in Se-SPep and SPep.

| Amino Acid                 | Se-SPep (%)  | SPep (%)     |
|----------------------------|--------------|--------------|
| Aspartic acid <sup>a</sup> | 11.36 ± 0.18 | 10.52 ± 1.29 |
| Serine <sup>a</sup>        | 4.28 ± 0.08  | 3.72 ± 0.04  |
| Glutamic acid <sup>a</sup> | 23.87 ± 0.26 | 19.65 ± 0.88 |
| Proline <sup>a</sup>       | 4.77 ± 0.13  | 8.08 ± 0.19  |
| Glycine <sup>a</sup>       | 3.96 ± 0.07  | 3.70 ± 0.12  |
| Alanine <sup>a</sup>       | 3.70 ± 0.08  | 3.72 ± 0.15  |
| Cysteine <sup>a</sup>      | 0.25 ± 0.06  | 0.69 ± 0.03  |
| Tyrosine <sup>a</sup>      | 3.84 ± 0.37  | 3.61 ± 0.08  |
| Arginine <sup>a</sup>      | 7.10 ± 0.23  | 9.12 ± 0.44  |
| Threonine <sup>b</sup>     | 3.23 ± 0.16  | 2.04 ± 0.36  |
| Valine <sup>b</sup>        | 5.69 ± 0.22  | 5.47 ± 0.25  |
| Methionine <sup>b</sup>    | 1.39 ± 0.18  | 0.91 ± 0.01  |
| Isoleucine <sup>b</sup>    | 4.55 ± 0.17  | 4.38 ± 0.26  |
| Leucine <sup>b</sup>       | 6.99 ± 0.07  | 8.42 ± 0.38  |
| Phenylalanine <sup>b</sup> | 5.13 ± 0.09  | 5.53 ± 0.22  |
| Histidine <sup>b</sup>     | 2.88 ± 0.15  | 2.76 ± 0.16  |
| Lysine <sup>b</sup>        | 7.02 ± 0.19  | 7.67 ± 0.44  |

Values are expressed as means ± SD (n=3). <sup>a</sup> Non-essential amino acids, <sup>b</sup> Essential amino acids.

**Table S2.** Mean concentration ( $\mu\text{g/g}$ ) of main compositions detected in PM2.5 sample

|                | Component              | Concentration | Component                | Concentration |
|----------------|------------------------|---------------|--------------------------|---------------|
| Trace Elements | Total Mercury          | 5.32          | Copper                   | 847           |
|                | Aluminum               | 33480         | Lead                     | 286           |
|                | Cadmium                | 4.34          | Manganese                | 780           |
|                | Chromium               | 462.2         | Vanadium                 | 85.5          |
| PAH            | Fluorene               | 0.195         | Benzo[a]pyrene           | 3.7           |
|                | Fluoranthene           | 10.28         | Perylene                 | 0.769         |
|                | Pyrene                 | 8.01          | Benzo[ghi]perylene       | 5.6           |
|                | Benzo[ghi]fluoranthene | 3.158         | Indeno[1,2,3-cd]pyrene   | 4.87          |
|                | Benzo[c]phenanthrene   | 1.597         | Dibenz[a,c]anthracene    | 0.509         |
|                | Benz[a]anthracene      | 4.82          | Dibenz[a,j]anthracene    | 0.61          |
|                | Chrysene               | 6.82          | Dibenz[a,h]anthracene    | 0.717         |
|                | Triphenylene           | 1.794         | Benzo[b]chrysene         | 0.662         |
|                | Benzo[b]fluoranthene   | 7.51          | Picene                   | 1.242         |
|                | Benzo[j]fluoranthene   | 4.37          | Coronene                 | 2.156         |
|                | Benzo[k]fluoranthene   | 3.48          | Dibenzo[b,k]fluoranthene | 1.013         |
|                | Benzo[a]fluoranthene   | 0.898         | Dibenzo[a,c]pyrene       | 0.812         |
|                | Benzo[e]pyrene         | 4.77          |                          |               |
| PBDE           | PBDE 99                | 0.0076        | PBDE 209                 | 0.243         |

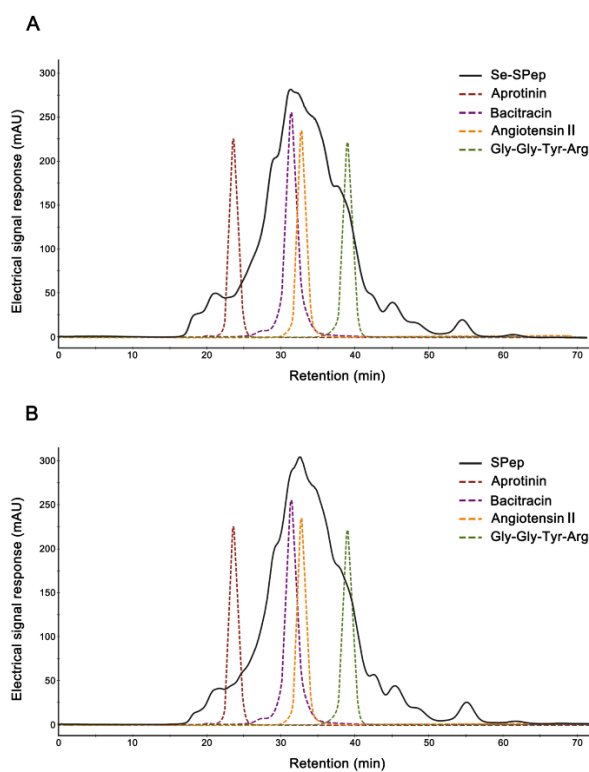

**Figure S1.** Sephadex G-25 chromatograms of the standard molecular weight samples of Se-SPep (A) and SPep (B). The standard molecular weight samples: Aprotinin-6511 Da, Bacitracin-1422 Da, Angiotensin II-1046 Da, and Gly-Gly-Tyr-Arg-451 Da.
